# Supplementary material
Source: Springer Nature journal article supplement (https://www.springermedizin.de/resource/supplementary/12885_2014_5135_MOESM9_ESM.pdf/9467904)

**A**Relative miR-21  
expression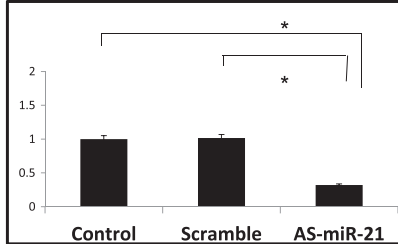Relative PTEN mRNA  
expression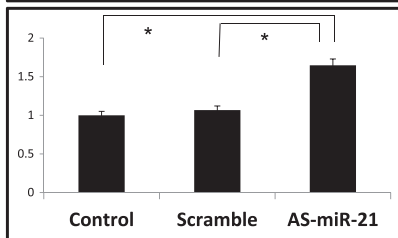

RMG-II cell

Control      Scramble      As-miR-21

PTEN

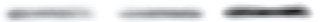 $\beta$ -Actin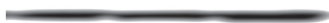**B**Normalized luciferase activity  
(Firefly/ Renilla)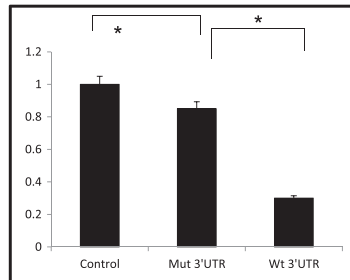

Supplement: MOESM9 [file 9467904]
